# Supplementary material for: Identification of a lathyrane-type diterpenoid EM-E-11-4 as a novel paclitaxel resistance reversing agent with multiple mechanisms of action
Source: publisher site journal article supplement (doi:10.18632/aging.102842), 2020-02-28
Supplement: Supplementary file [file aging-v12i4-102842-supplementary-material-SD2.pdf]

## SUPPLEMENTARY TABLE

**Supplementary Table 1. The binding constants of paclitaxel for MTs (35°C).**

| <b>Compound</b>  | <b>Binding constants of paclitaxel</b> |
|------------------|----------------------------------------|
| /                | 0.52±0.05 M <sup>-1</sup>              |
| + EM-E-11-4 10μM | 1.59±0.07 M <sup>-1</sup>              |

Data are presented as mean ± SD from three independent experiments.
